# Supplementary material
Source: PubMed Central journal article supplement (PMC3947796)
Supplement: NIHMS556680-supplement-Supplementary_Info.pdf [file NIHMS556680-supplement-Supplementary_Info.pdf]

## Supplementary Information for

# **Metrics other than potency reveal systematic variation in responses to cancer drugs**

Mohammad Fallahi-Sichani<sup>1</sup>, Saman Honarnejad<sup>1</sup>, Laura M. Heiser<sup>2</sup>, Joe W. Gray<sup>2</sup> and Peter K. Sorger<sup>1</sup>

<sup>1</sup>HMS LINCS Center, Department of Systems Biology, Harvard Medical School, Boston, MA 02115

<sup>2</sup>Department of Biomedical Engineering, Oregon Health and Science University, Portland, OR 97239

### **Address correspondence to:**

Peter K. Sorger, Email: [peter\\_sorger@hms.harvard.edu](mailto:peter_sorger@hms.harvard.edu)

## **Supplementary Results**

| <b>Supplementary Tables</b>  | <b>Page</b> |
|------------------------------|-------------|
| Supplementary Table 1        | 2           |
| Supplementary Table 2        | 4           |
| Supplementary Table 3        | 5           |
| <br>                         |             |
| <b>Supplementary Figures</b> |             |
| Supplementary Figure 1       | 6           |
| Supplementary Figure 2       | 7           |
| Supplementary Figure 3       | 8           |
| Supplementary Figure 4       | 9           |
| Supplementary Figure 5       | 10          |
| Supplementary Figure 6       | 11          |
| Supplementary Figure 7       | 12          |
| Supplementary Figure 8       | 13          |
| Supplementary Figure 9       | 14          |
| Supplementary Table 10       | 15          |

**Supplementary Table 1:** List of anti-cancer drugs used in multi-parametric dose-response analysis and their nominal targets or mechanisms of action

| <b>Drug</b>            | <b>Nominal target</b> | <b>Drug class in similarity score analysis</b> |
|------------------------|-----------------------|------------------------------------------------|
| Sigma AKT1-2 inhibitor | AKT                   | AKT inhibitor                                  |
| Triciribine            | AKT                   |                                                |
| GSK1070916             | AURK                  | AURK inhibitor                                 |
| VX-680                 | AURK/FLT3/ABL/JAK2    |                                                |
| Olomoucine II          | CDK1                  | CDK1 inhibitor                                 |
| NU6102                 | CDK1/2                |                                                |
| Carboplatin            | DNA cross-linker      | DNA cross-linking                              |
| Cisplatin              | DNA cross-linker      |                                                |
| Oxaliplatin            | DNA cross-linker      |                                                |
| AG1478                 | EGFR                  | EGFR inhibitor                                 |
| Erlotinib              | EGFR                  |                                                |
| Gefitinib              | EGFR                  |                                                |
| LBH589                 | HDAC                  | HDAC inhibitor                                 |
| Oxamflatin             | HDAC                  |                                                |
| Vorinostat             | HDAC                  |                                                |
| Trichostatin A         | HDAC                  |                                                |
| Valproic acid          | HDAC                  |                                                |
| Geldanamycin           | HSP90                 | HSP90 inhibitor                                |
| 17-AAG                 | HSP90                 |                                                |
| Everolimus             | MTOR                  | mTOR inhibitor                                 |
| PP242 hydrate          | MTOR                  |                                                |
| Temsirolimus           | MTOR                  |                                                |
| GSK1059615             | PI3K                  | PI3K inhibitor                                 |
| GSK2119563A            | PI3K                  |                                                |
| GSK2126458A            | PI3K                  |                                                |
| CGC-11047              | Polyamine analogue    | Polyamine analogue                             |
| CGC-11144              | Polyamine analogue    |                                                |
| Bortezomib             | Proteasome            | Proteasome inhibitor                           |
| MG-132                 | Proteasome            |                                                |
| Z-Leu-Leu-Leu-al       | Proteasome            |                                                |
| Z-Leu-Leu-Norvalinal   | Proteasome            |                                                |
| CPT-11                 | TOP1                  | TOP1 inhibitor                                 |

|                         |                      |                |
|-------------------------|----------------------|----------------|
| Topotecan               | TOP1                 |                |
| Doxorubicin             | TOP2                 | TOP2 inhibitor |
| Epirubicin              | TOP2                 |                |
| Etoposide               | TOP2                 |                |
| Docetaxel               | TUBB                 |                |
| Paclitaxel              | TUBB                 | TUBB inhibitor |
| Vinorelbine             | TUBB                 |                |
| Ixabepilone             | TUBB                 |                |
| 5-FUdR                  | TYMS                 |                |
| 5-FU                    | TYMS                 | TYMS inhibitor |
| Imatinib                | ABL/KIT/PDGFR        | N/A            |
| NSC663284               | CDC25                | N/A            |
| Fascaplysin             | CDK4                 | N/A            |
| GSK923295               | CENPE                | N/A            |
| TCS2312 dihydrochloride | CHK1                 | N/A            |
| BIBW2992                | EGFR/HER2            | N/A            |
| XRP44X                  | ELK3                 | N/A            |
| Tamoxifen               | ESR1                 | N/A            |
| Ibandronate sodium salt | FDPS                 | N/A            |
| PD173074                | FGFR1/3              | N/A            |
| Lestaurtinib            | FLT3/JAK2/TrkA       | N/A            |
| Gemcitabine             | DNA replication      | N/A            |
| GSK1838705A             | IGF1R                | N/A            |
| IKK 16                  | IKK                  | N/A            |
| SB-715992               | KSP                  | N/A            |
| Baicalein               | Lipoxygenase         | N/A            |
| Nutlin 3a               | MDM2                 | N/A            |
| GSK1120212              | MEK                  | N/A            |
| Bosutinib               | Src                  | N/A            |
| MLN4924                 | NAE1                 | N/A            |
| Sunitinib Malate        | PDGFR/VEGFR/KIT/FLT3 | N/A            |
| GSK461364               | PLK1                 | N/A            |

**Supplementary Table 2:** Empirical mutual information scores (and their corresponding  $P$  values) between each of the estimated key dose-response parameters and the set of anti-cancer compounds and the breast cell line panel

| Parameter            | All drugs <sup>1</sup> |                             | Drugs excluding cell cycle inhibitors |                             |
|----------------------|------------------------|-----------------------------|---------------------------------------|-----------------------------|
|                      | $I$ (parameter; drugs) | $I$ (parameter; cell lines) | $I$ (parameter; drugs)                | $I$ (parameter; cell lines) |
| $\log_{10}(EC_{50})$ | 1.52 ( $P < 10^{-4}$ ) | 0.12 ( $P = 0.99$ )         | 1.46 ( $P < 10^{-4}$ )                | 0.17 ( $P = 0.99$ )         |
| $\log_{10}(IC_{50})$ | 1.40 ( $P < 10^{-4}$ ) | 0.16 ( $P = 0.05$ )         | 1.42 ( $P < 10^{-4}$ )                | 0.17 ( $P = 0.99$ )         |
| Hill slope           | 0.66 ( $P < 10^{-4}$ ) | 0.18 ( $P = 0.11$ )         | 0.70 ( $P < 10^{-4}$ )                | 0.25 ( $P = 0.80$ )         |
| $E_{max}$            | 0.69 ( $P < 10^{-4}$ ) | 0.23 ( $P < 10^{-4}$ )      | 0.69 ( $P < 10^{-4}$ )                | 0.25 ( $P = 0.03$ )         |
| $E_{inf}$            | 0.57 ( $P < 10^{-4}$ ) | 0.19 ( $P < 10^{-4}$ )      | 0.53 ( $P < 10^{-4}$ )                | 0.24 ( $P = 0.02$ )         |

Notes:

1. Mutual information for the parameters in the first column across all 64 drugs in the data set



**Supplementary Table 3:** Pharmacokinetic data ( $MTD$  and  $C_{max}$ ) for a selection of anti-cancer drugs and the metric suggested based on our analysis for comparison of drug sensitivity for breast cancer lines exposed to  $C_{max}$

| Drug          | Proposed $MTD$        | Route of administration | $C_{max}$ at proposed $MTD$ ( $\mu M$ ) | $IC_{50}$ of the most breast cancer cell line ( $\mu M$ ) | Reference | Suggested metric for breast cancer analysis |
|---------------|-----------------------|-------------------------|-----------------------------------------|-----------------------------------------------------------|-----------|---------------------------------------------|
| 17-AAG        | 21 mg/m <sup>2</sup>  | 1-2 h infusion          | 8.5±4.7                                 | 0.026                                                     | 1         | AUC                                         |
| BIBW2992      | 70 mg/day             | Oral                    | 0.37±0.13                               | 0.017                                                     | 2         | IC50                                        |
| Bortezomib    | 1.6 mg/m <sup>2</sup> | i.v.                    | 0.11±0.20                               | 0.021                                                     | 3         | EC50/AUC                                    |
| Epirubicin    | 150 mg/m <sup>2</sup> | i.v.                    | 5.68±2.76                               | 0.083                                                     | 4         | IC50/Emax                                   |
| Gefitinib     | 2000 mg/twice weekly  | Oral                    | 5.55±3.16                               | 0.24                                                      | 5         | AUC                                         |
| Everolimus    | 70mg/wk               | Oral                    | 0.18±0.05                               | 0.04                                                      | 6         | AUC                                         |
| GSK923295     | 190mg/m <sup>2</sup>  | 1 hr infusion           | 12±7.2                                  | 0.022                                                     | 7         | AUC/Emax                                    |
| LBH589        | 14 mg/m <sup>2</sup>  | 30 min infusion         | 1.62±1.29                               | 0.044                                                     | 8         | AUC/Emax                                    |
| SB-715992     | 12 mg/m <sup>2</sup>  | 1 hr infusion           | 0.48±0.26                               | 0.02                                                      | 9         | IC50                                        |
| Topotecan     | 1.5 mg/m <sup>2</sup> | 30 min infusion         | 0.073±0.023                             | 0.005                                                     | 10        | AUC                                         |
| Valproic acid | 60 mg/kg              | 1 hr infusion           | 1248±208                                | 1136                                                      | 11        | EC50                                        |
| Vinorelbine   | 30 mg/m <sup>2</sup>  | 15 min infusion         | 1                                       | 0.004                                                     | 12        | IC50                                        |
| 5-FU          | 15 mg/kg              | i.v.                    | 461                                     | 15                                                        | 12        | IC50                                        |
| Carboplatin   | 330 mg/m <sup>2</sup> | 30 min infusion         | 123                                     | 12                                                        | 12        | IC50                                        |
| Cisplatin     | 100 mg/m <sup>2</sup> | i.v.                    | 8.3                                     | 2.1                                                       | 12        | EC50                                        |
| Doxorubicin   | 60 mg/m <sup>2</sup>  | i.v.                    | 1.1                                     | 0.028                                                     | 12        | Emax                                        |
| Etoposide     | 290 mg/m <sup>2</sup> | i.v.                    | 58.1                                    | 0.45                                                      | 12        | IC50/Emax                                   |
| Gemcitabine   | 790mg/m <sup>2</sup>  | 30 min infusion         | 57                                      | 0.003                                                     | 12        | Emax                                        |
| Paclitaxel    | 175mg/m <sup>2</sup>  | 3 hr infusion           | 4.27                                    | 0.004                                                     | 12        | Emax                                        |

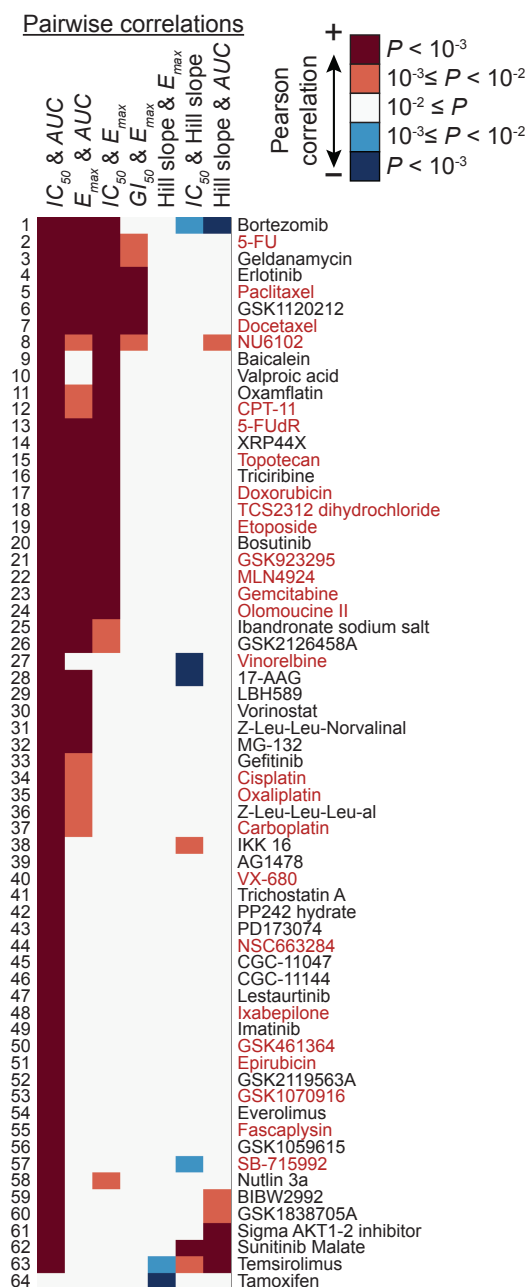

### Supplementary Figure 1:

Different dose-response parameters representing drug sensitivity do not always correlate with each other. Pairwise correlation between different dose-response parameters estimated for each drug across the breast cell lines are shown and cell-cycle phase-specific cytotoxic compounds are denoted by red.  $P$  values were corrected using the Holm-Bonferroni method.

Correlation of descriptors with cell line doubling times

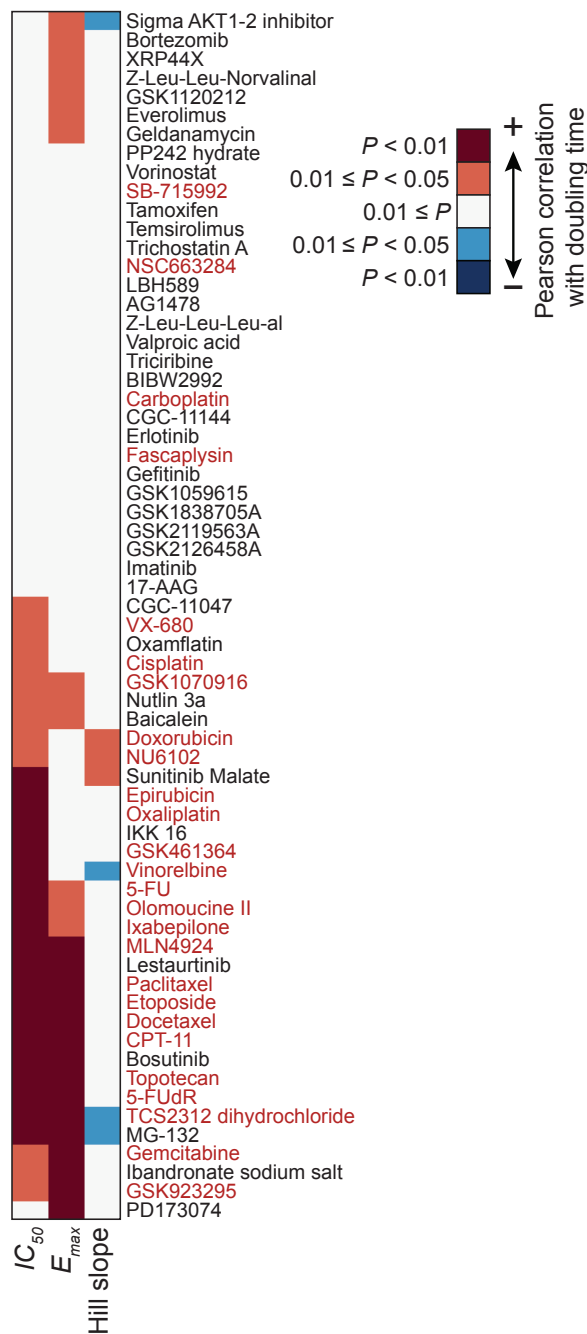

**Supplementary Figure 2:**

Correlation between different dose-response parameters estimated for the set of anti-cancer compounds and the doubling times across the breast cell lines. Cell-cycle phase-specific cytotoxic compounds are denoted by red.  $P$  values were corrected using the Benjamini-Hochberg method.

### Principal component (PC) analysis

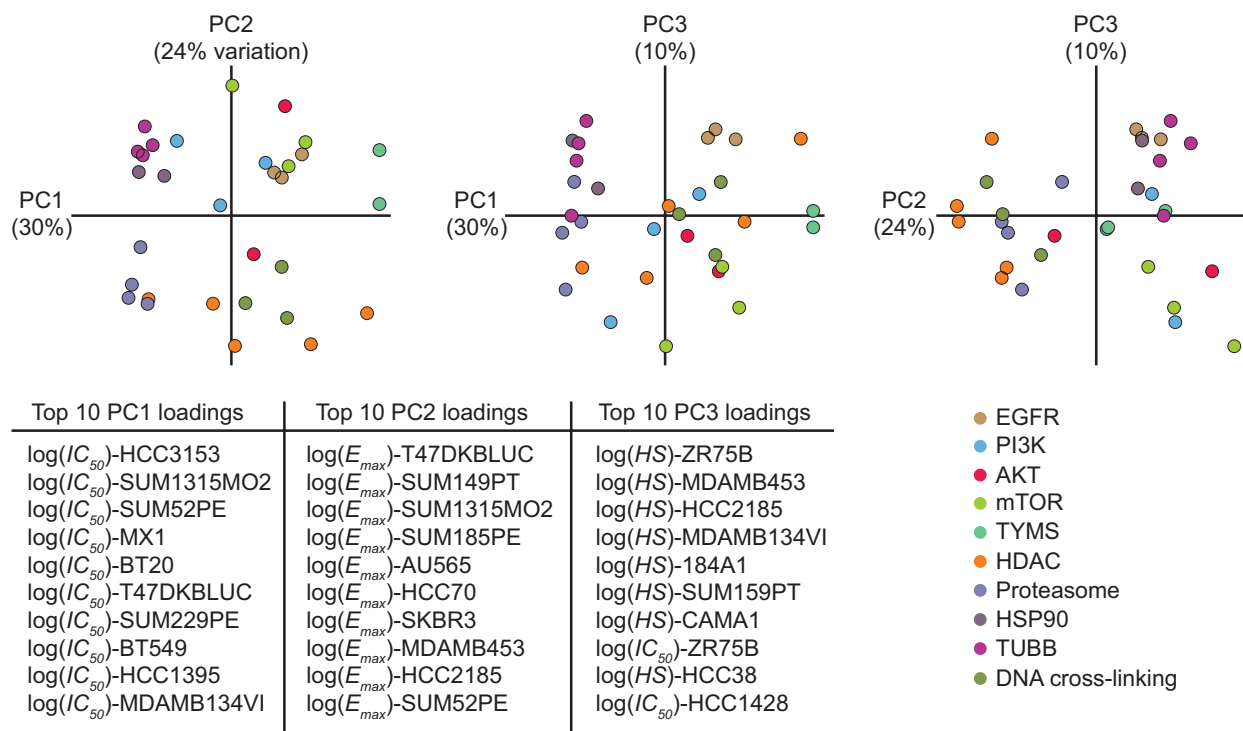

### Supplementary Figure 3:

Principal component analysis of dose-response data ( $IC_{50}$ ,  $E_{max}$  and Hill slope) for 31 drugs and 53 cell lines. PCA recognizes the multi-dimensional dose-response relationship between drugs and their targets into principal components that can be plotted to indicate the relatedness of each individual parameter ( $IC_{50}$ ,  $E_{max}$  or  $HS$  across all the cell lines) to drug target. Drugs from most classes cluster based on values of  $IC_{50}$ ,  $E_{max}$  and  $HS$  parameters. The top 10 loadings for each of principal components 1, 2, and 3 are shown.

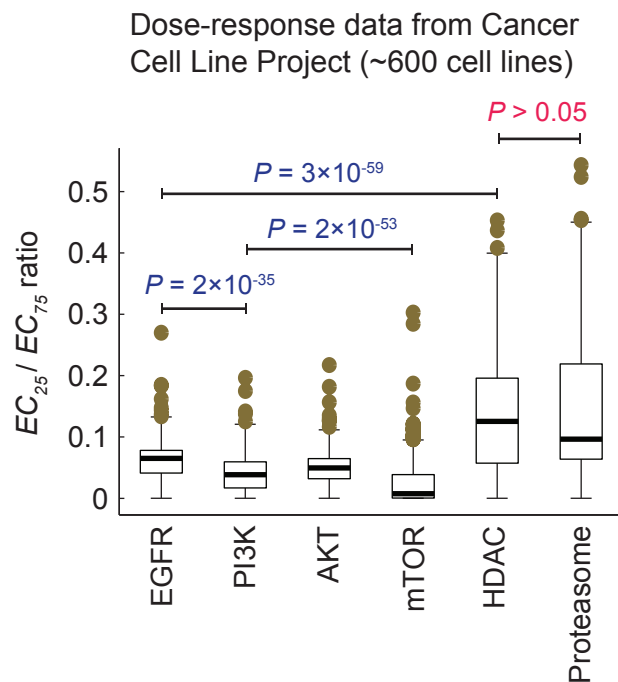

**Supplementary Figure 4:**

Association of Hill slope (approximated by the  $EC_{25}/EC_{75}$  ratio) with drug class is shown based on dose-response data on ~600 cell lines from the Cancer Cell line Project.

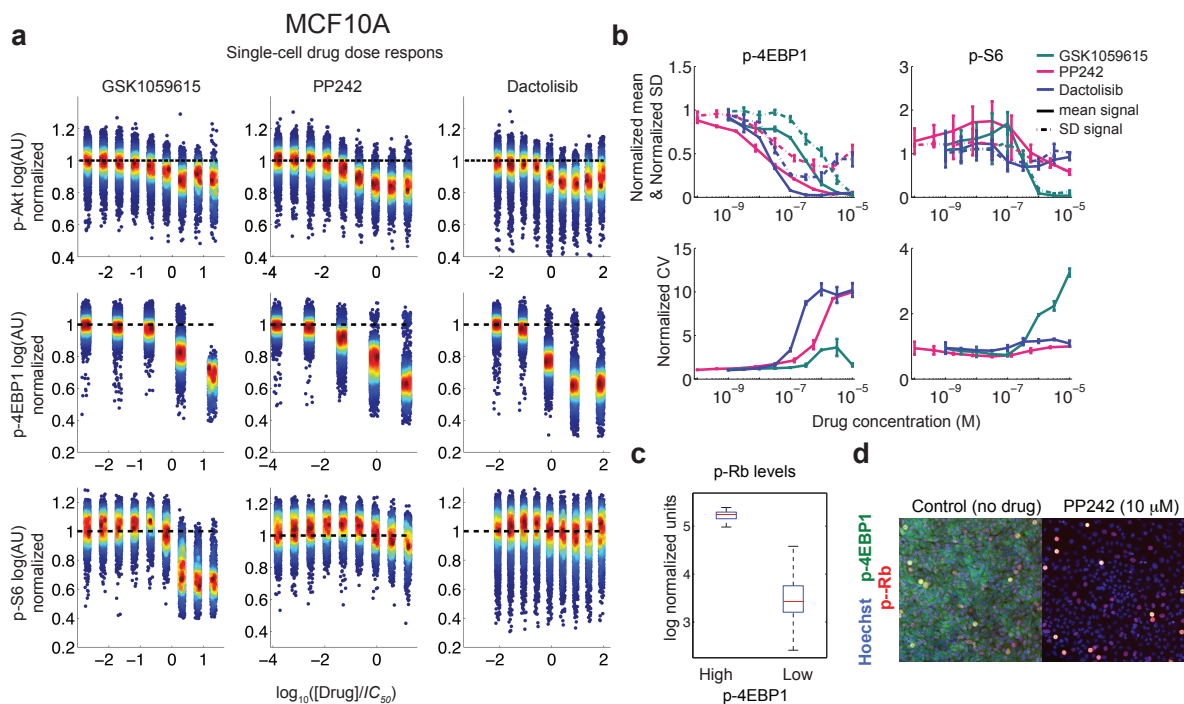

### Supplementary Figure 5:

Single-cell analysis of drug dose response of the MCF10A cells to pharmacological inhibition of PI3K/Akt/mTOR pathway. (a) Single cell drug dose-response data measured for p-Akt (Ser473), p-4EBP1 (Thr37/46), and p-S6 (Ser235/236) after treatment with nine doses of GSK1059615, PP242 or dactolisib. (b) Dose-dependent variation of the mean signal, standard deviation (SD) and coefficient of variation (CV; the standard deviation for single cell measurements divided by the population-average) for single cell p-4EBP1 and p-S6 levels after treatment with GSK1059615, PP242 or dactolisib. (c) Cells with high p-4EBP1 levels 24 hr after exposure to 10  $\mu$ M PP242 exhibit ~10 times higher levels of p-Rb than low-p4EBP1 cells (cells with p-4EBP1 levels below the population average p-4EBP1 level in the absence of drug). (d) Selected immunofluorescence images of p-4EBP1 (green), p-Rb (red) and Hoechst (blue) staining of cells in the absence of drug and 24 hr after exposure to 10  $\mu$ M PP242.

### Cell Viability Assays

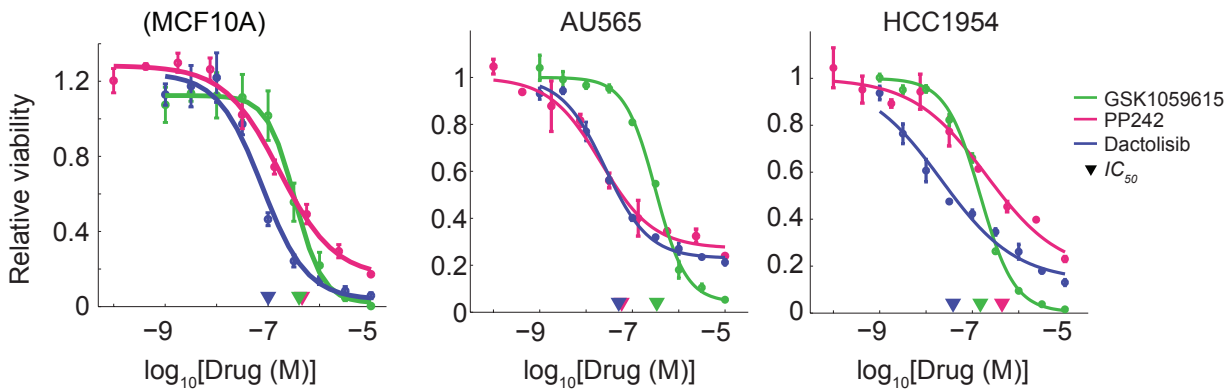

**Supplementary Figure 6:** Cell viability measurements using microscopy. Experimental data confirm  $HS < 1$  and  $E_{max} > 0$  for the drugs PP242 and dactolisib and  $HS \sim 1$  for GSK1059615 across the tested cell lines.

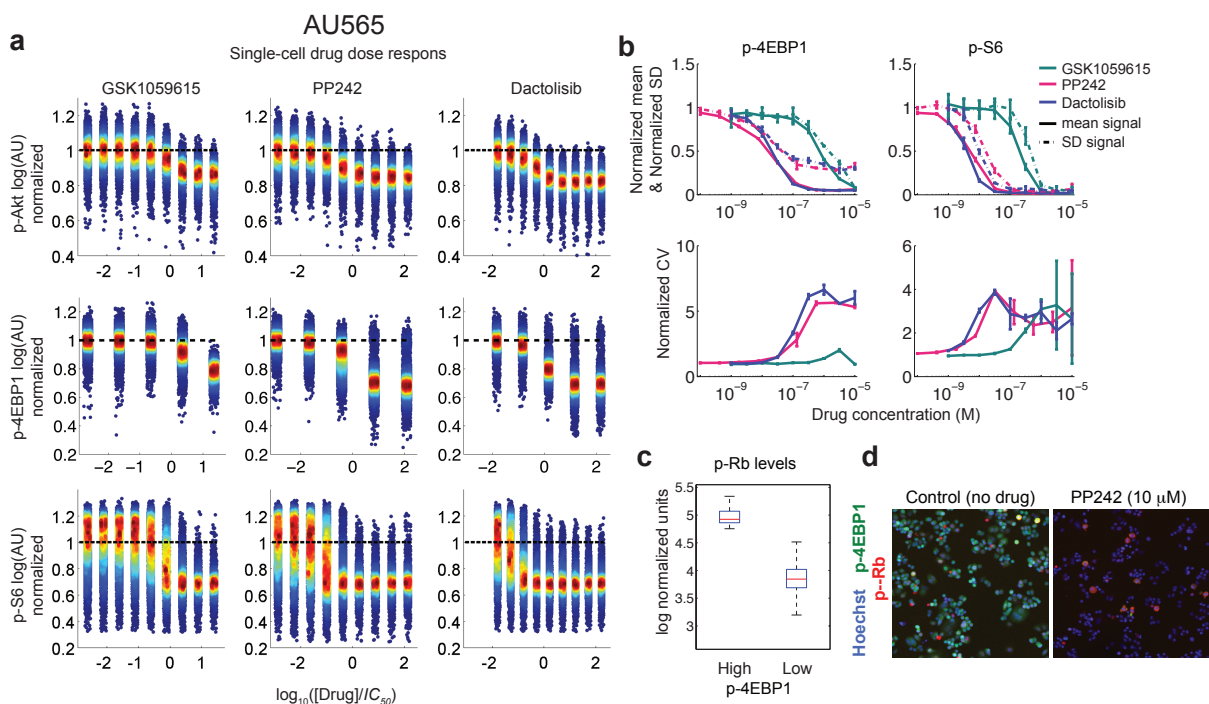

### Supplementary Figure 7:

Single-cell analysis of drug dose response of the AU565 cells to pharmacological inhibition of PI3K/Akt/mTOR pathway. (a) Single cell drug dose-response data measured for p-Akt (Ser473), p-4EBP1 (Thr37/46), and p-S6 (Ser235/236) after treatment with nine doses of GSK1059615, PP242 or dactolisib. (b) Dose-dependent variation of the mean signal, standard deviation (SD) and coefficient of variation (CV; the standard deviation for single cell measurements divided by the population-average) for single cell p-4EBP1 and p-S6 levels after treatment with GSK1059615, PP242 or dactolisib. (c) Cells with high p-4EBP1 levels 24 hr after exposure to 10  $\mu$ M PP242 exhibit  $\sim$ 10 times higher levels of p-Rb than low-p4EBP1 cells (cells with p-4EBP1 levels below the population average p-4EBP1 level in the absence of drug). (d) Selected immunofluorescence images of p-4EBP1 (green), p-Rb (red) and Hoechst (blue) staining of cells in the absence of drug and 24 hr after exposure to 10  $\mu$ M PP242.



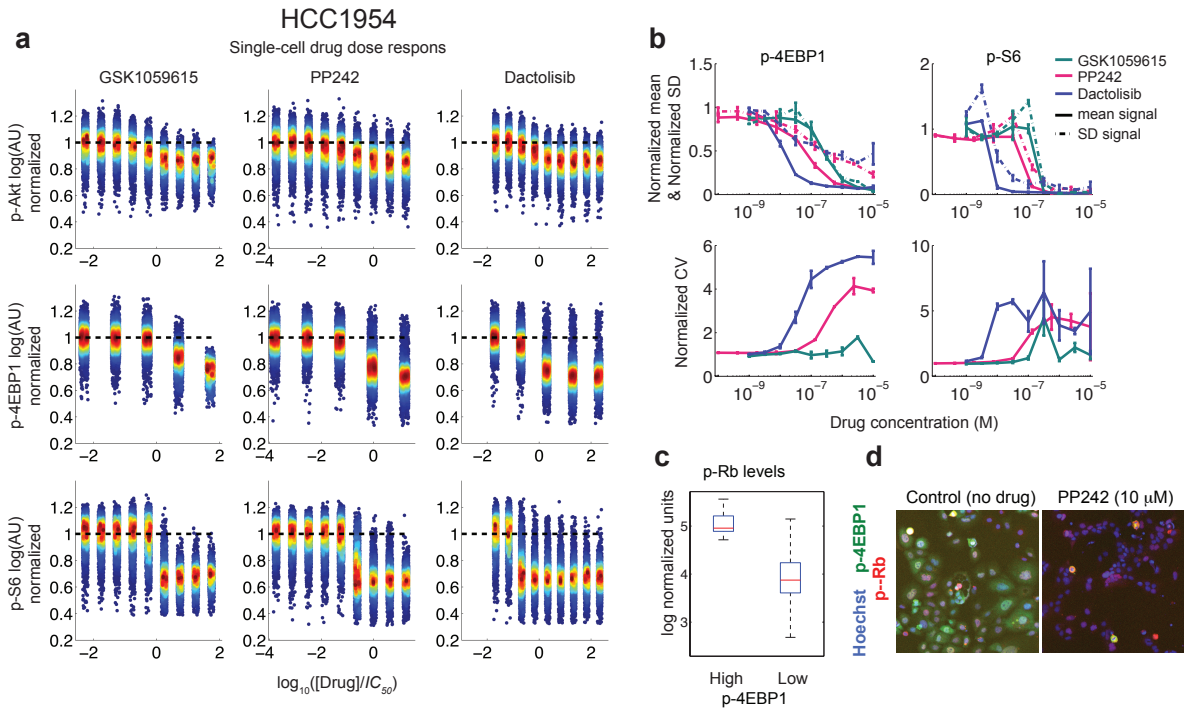

### Supplementary Figure 8:

Single-cell analysis of drug dose response of the HCC1954 cells to pharmacological inhibition of PI3K/Akt/mTOR pathway. (a) Single cell drug dose-response data measured for p-Akt (Ser473), p-4EBP1 (Thr37/46), and p-S6 (Ser235/236) after treatment with nine doses of GSK1059615, PP242 or dactolisib. (b) Dose-dependent variation of the mean signal, standard deviation (SD) and coefficient of variation (CV; the standard deviation for single cell measurements divided by the population-average) for single cell p-4EBP1 and p-S6 levels after treatment with GSK1059615, PP242 or dactolisib. (c) Cells with high p-4EBP1 levels 24 hr after exposure to 10  $\mu$ M PP242 exhibit ~10 times higher levels of p-Rb than low-p4EBP1 cells (cells with p-4EBP1 levels below the population average p-4EBP1 level in the absence of drug). (d) Selected immunofluorescence images of p-4EBP1 (green), p-Rb (red) and Hoechst (blue) staining of cells in the absence of drug and 24 hr after exposure to 10  $\mu$ M PP242.

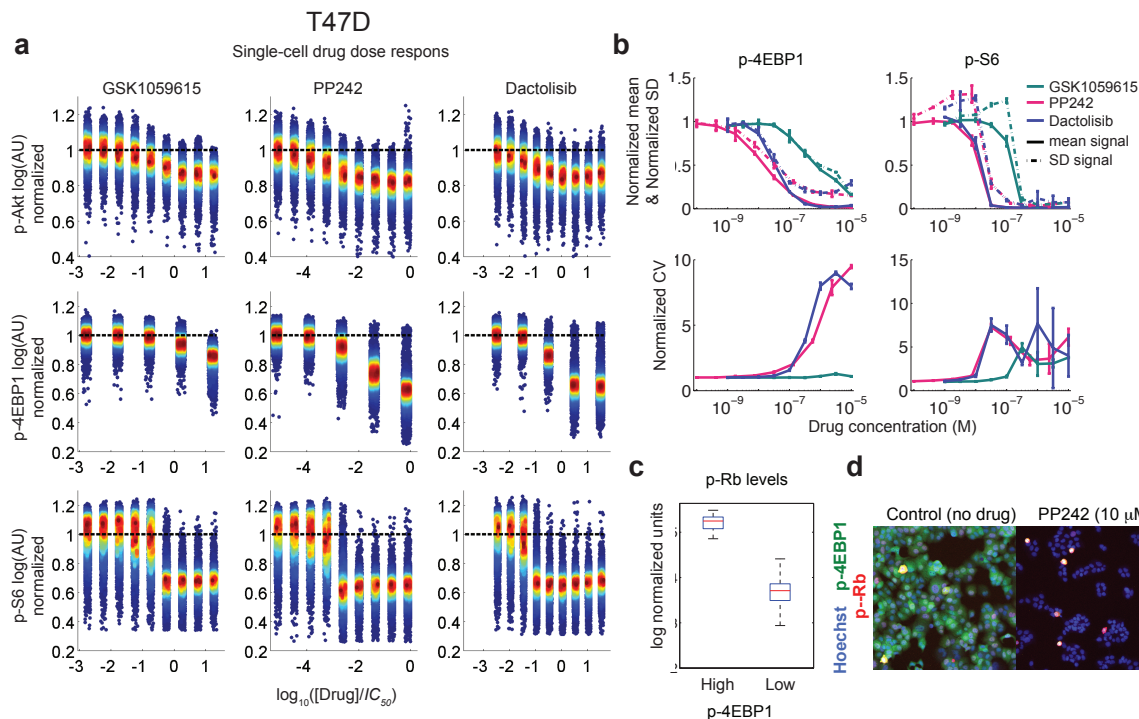

### Supplementary Figure 9:

Single-cell analysis of drug dose response of the T47D cells to pharmacological inhibition of PI3K/Akt/mTOR pathway. (a) Single cell drug dose-response data measured for p-Akt (Ser473), p-4EBP1 (Thr37/46), and p-S6 (Ser235/236) after treatment with nine doses of GSK1059615, PP242 or dactolisib. (b) Dose-dependent variation of the mean signal, standard deviation (SD) and coefficient of variation (CV; the standard deviation for single cell measurements divided by the population-average) for single cell p-4EBP1 and p-S6 levels after treatment with GSK1059615, PP242 or dactolisib. (c) Cells with high p-4EBP1 levels 24 hr after exposure to 10  $\mu$ M PP242 exhibit  $\sim$ 10 times higher levels of p-Rb than low-p4EBP1 cells (cells with p-4EBP1 levels below the population average p-4EBP1 level in the absence of drug). (d) Selected immunofluorescence images of p-4EBP1 (green), p-Rb (red) and Hoechst (blue) staining of cells in the absence of drug and 24 hr after exposure to 10  $\mu$ M PP242.

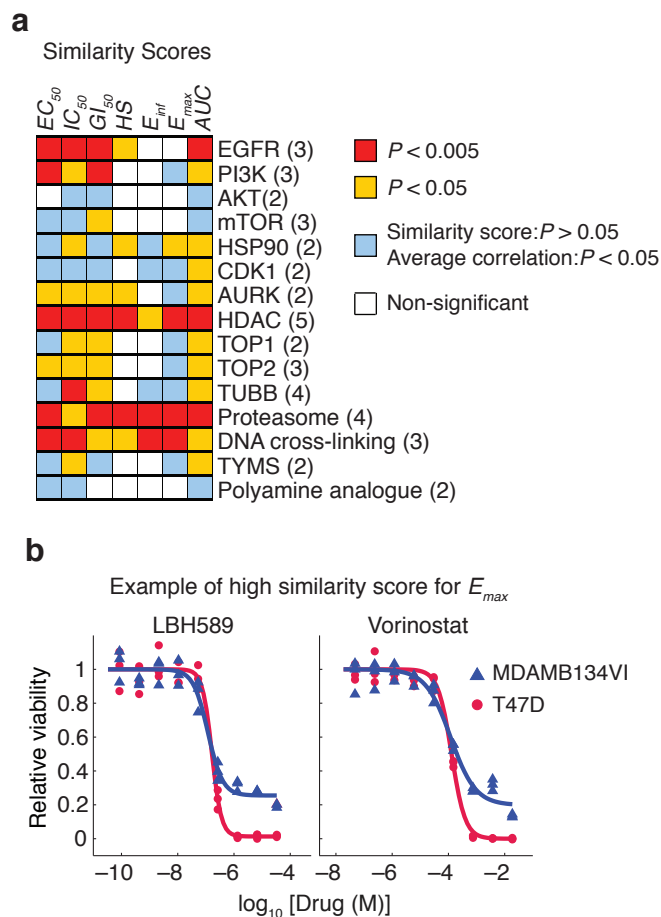

**Supplementary Figure 10:** Different dose-response parameters capture cell line to cell line variation associated with different mechanisms of action. (a) Similarity score matrix showing significant similarities between patterns of response across the breast cell line panel for all drug classes that have at least two different compounds. The number of compounds within each class is shown in parentheses. (b) Dose-response relationships for two HDAC inhibitors (LBH589 and vorinostat) and two breast cancer cell lines (MDAMB134VI and T47D) that represent high similarity score of  $E_{max}$  for HDAC inhibitors. Each data-point represents one of the three replicates of the dose-response experiment.

### References cited in Supplementary Table 3:

1. Kummar, S. *et al.* Phase I trial of 17-dimethylaminoethylamino-17-demethoxygeldanamycin (17-DMAG), a heat shock protein inhibitor, administered twice weekly in patients with advanced malignancies. *Eur. J. Cancer* **46**, 340-347 (2010).
2. Eskens, F. A. *et al.* A phase I dose escalation study of BIBW 2992, an irreversible dual inhibitor of epidermal growth factor receptor 1 (EGFR) and 2 (HER2) tyrosine kinase in a 2-week on, 2-week off schedule in patients with advanced solid tumours. *Br. J. Cancer* **98**, 80-85 (2008).
3. Papandreou, C. N. *et al.* Phase I trial of the proteasome inhibitor bortezomib in patients with advanced solid tumors with observations in androgen-independent prostate cancer. *J. Clin. Oncol.* **22**, 2108-2121 (2004).
4. Tjuljandin, S. A. *et al.* Pharmacokinetics and toxicity of two schedules of high dose epirubicin. *Cancer Res.* **50**, 5095-5101 (1990).
5. Gross, M. E., Leichman, L., Lowe, E. S., Swaisland, A. & Agus, D. B. Safety and pharmacokinetics of high-dose gefitinib in patients with solid tumors: results of a phase I study. *Cancer Chemother. Pharmacol.* **69**, 273-280 (2012).
6. O'Donnell, A. *et al.* Phase I pharmacokinetic and pharmacodynamic study of the oral mammalian target of rapamycin inhibitor everolimus in patients with advanced solid tumors. *J. Clin. Oncol.* **26**, 1588-1595 (2008).
7. Chung, V. *et al.* First-time-in-human study of GSK923295, a novel antimitotic inhibitor of centromere-associated protein E (CENP-E), in patients with refractory cancer. *Cancer Chemother. Pharmacol.* **69**, 733-741 (2012).
8. Giles, F. *et al.* A phase I study of intravenous LBH589, a novel cinnamic hydroxamic acid analogue histone deacetylase inhibitor, in patients with refractory hematologic malignancies. *Clin. Cancer Res.* **12**, 4628-4635 (2006).
9. Gomez, H. L. *et al.* Phase I dose-escalation and pharmacokinetic study of ispinesib, a kinesin spindle protein inhibitor, administered on days 1 and 15 of a 28-day schedule in patients with no prior treatment for advanced breast cancer. *Anticancer Drugs* **23**, 335-341 (2012).
10. van Warmerdam, L. J. *et al.* Pharmacokinetics and pharmacodynamics of topotecan administered daily for 5 days every 3 weeks. *Cancer Chemother. Pharmacol.* **35**, 237-245 (1995).
11. Atmaca, A. *et al.* Valproic acid (VPA) in patients with refractory advanced cancer: a dose escalating phase I clinical trial. *Br. J. Cancer* **97**, 177-182 (2007).
12. Fridborg, H., Nygren, P. & Larsson, R. Relationship between pharmacokinetic parameters in patients and cytotoxicity in vitro of standard and investigational anticancer drugs. *Anticancer Drugs* **6**, 64-69 (1995).
